# Supplementary material
Source: PubMed Central journal article supplement (PMC5819606)

| Main Exposures                                                     | Annual Per Capita<br>Income ≤ \$11,250 |                  | Annual Per Capita<br>Income > \$11,250 |                  | At Least College Degree |                  | No College Degree |                  |
|--------------------------------------------------------------------|----------------------------------------|------------------|----------------------------------------|------------------|-------------------------|------------------|-------------------|------------------|
|                                                                    | OR                                     | 95% CI           | OR                                     | 95% CI           | OR                      | 95% CI           | OR                | 95% CI           |
| <b>Driving Time</b>                                                |                                        |                  |                                        |                  |                         |                  |                   |                  |
| <b>Marginal Effects</b>                                            |                                        |                  |                                        |                  |                         |                  |                   |                  |
| 20 vs. 10 Minutes                                                  | 1.28                                   | 0.87-1.90        | <b>1.25</b>                            | <b>1.04-1.62</b> | 1.04                    | 0.65-1.66        | <b>1.27</b>       | <b>1.00-1.62</b> |
| 30 vs. 20 Minutes                                                  | 0.76                                   | 0.57-1.03        | 0.91                                   | 0.77-1.07        | 0.78                    | 0.60-1.01        | 0.91              | 0.76-1.08        |
| 40 vs. 30 Minutes                                                  | <b>0.58</b>                            | <b>0.35-0.97</b> | <b>0.76</b>                            | <b>0.60-0.98</b> | <b>0.68</b>             | <b>0.46-1.00</b> | 0.76              | 0.56-1.03        |
| <b>Short Driving Times<br/>as Reference</b>                        |                                        |                  |                                        |                  |                         |                  |                   |                  |
| 30 vs. 10 Minutes                                                  | 0.98                                   | 0.60-1.59        | 1.13                                   | 0.81-1.59        | <b>0.81</b>             | <b>0.44-1.50</b> | 1.16              | 0.86-1.56        |
| 40 vs. 10 Minutes                                                  | 0.43                                   | 0.26-1.22        | 0.87                                   | 0.55-1.35        | <b>0.55</b>             | <b>0.26-1.16</b> | 0.88              | 0.56-1.39        |
| <b>Number of Mammography<br/>Facilities within 10km<br/>Radius</b> |                                        |                  |                                        |                  |                         |                  |                   |                  |
| <b>Marginal Effects</b>                                            |                                        |                  |                                        |                  |                         |                  |                   |                  |
| 1 vs. 0 Facilities                                                 | 1.15                                   | 0.90-1.48        | <b>1.23</b>                            | <b>1.06-1.42</b> | 1.15                    | 0.90-1.48        | <b>1.21</b>       | <b>1.06-1.38</b> |
| 2 vs. 1 Facilities                                                 | 1.10                                   | 0.91-1.33        | <b>1.16</b>                            | <b>1.05-1.29</b> | 1.11                    | 0.92-1.33        | <b>1.15</b>       | <b>1.04-1.26</b> |
| 3 vs. 2 Facilities                                                 | 1.02                                   | 0.93-1.11        | <b>1.06</b>                            | <b>1.00-1.12</b> | 1.03                    | 0.94-1.13        | <b>1.05</b>       | <b>1.00-1.10</b> |
| 4 vs. 3 Facilities                                                 | 0.96                                   | 0.89-1.04        | 0.98                                   | 0.93-1.03        | 0.98                    | 0.90-1.06        | 0.97              | 0.93-1.02        |
| <b>No Nearby Facilities<br/>as Reference</b>                       |                                        |                  |                                        |                  |                         |                  |                   |                  |
| 2 vs. 0 Facilities                                                 | 1.27                                   | 0.82-1.96        | <b>1.43</b>                            | <b>1.11-1.83</b> | 1.28                    | 0.82-1.98        | <b>1.39</b>       | <b>1.10-1.74</b> |
| 3 vs. 0 Facilities                                                 | 1.29                                   | 0.78-2.15        | <b>1.51</b>                            | <b>1.13-2.03</b> | 1.31                    | 0.78-2.21        | <b>1.45</b>       | <b>1.10-1.90</b> |
| 4 vs. 0 Facilities                                                 | 1.24                                   | 0.75-2.06        | <b>1.49</b>                            | <b>1.11-1.99</b> | 1.28                    | 0.76-2.16        | <b>1.41</b>       | <b>1.07-1.85</b> |

Supplemental Table 1 Odds ratios of more frequent mammography screening use by geographic access, stratified by income and education (N=5,930), Wisconsin Women's Health Study, 1995-2007

| Main Exposures                                                     | Annual Per Capita<br>Income ≤ \$11,250 |                  | Annual Per Capita<br>Income > \$11,250 |                  | At Least College Degree |           | No College Degree |                  |
|--------------------------------------------------------------------|----------------------------------------|------------------|----------------------------------------|------------------|-------------------------|-----------|-------------------|------------------|
|                                                                    | OR                                     | 95% CI           | OR                                     | 95% CI           | OR                      | 95% CI    | OR                | 95% CI           |
| <b>Driving Time</b>                                                |                                        |                  |                                        |                  |                         |           |                   |                  |
| <b>Marginal Effects</b>                                            |                                        |                  |                                        |                  |                         |           |                   |                  |
| 20 vs. 10 Minutes                                                  | 1.33                                   | 0.85-2.09        | 1.27                                   | 0.92-1.75        | 0.96                    | 0.52-1.76 | <b>1.33</b>       | <b>1.01-1.77</b> |
| 30 vs. 20 Minutes                                                  | 0.76                                   | 0.55-1.05        | 0.96                                   | 0.80-1.16        | 0.79                    | 0.57-1.11 | 0.93              | 0.77-1.14        |
| 40 vs. 30 Minutes                                                  | <b>0.56</b>                            | <b>0.32-0.99</b> | 0.82                                   | 0.62-1.09        | 0.72                    | 0.43-1.20 | 0.77              | 0.54-1.08        |
| <b>Short Driving Times<br/>as Reference</b>                        |                                        |                  |                                        |                  |                         |           |                   |                  |
| 30 vs. 10 Minutes                                                  | 1.01                                   | 0.58-1.74        | 1.23                                   | 0.81-1.86        | 0.76                    | 0.35-1.67 | 1.24              | 0.88-1.76        |
| 40 vs. 10 Minutes                                                  | 0.57                                   | 0.24-1.31        | 1.01                                   | 0.60-1.70        | 0.55                    | 0.21-1.43 | 0.95              | 0.57-1.60        |
| <b>Number of Mammography<br/>Facilities within 10km<br/>Radius</b> |                                        |                  |                                        |                  |                         |           |                   |                  |
| <b>Marginal Effects</b>                                            |                                        |                  |                                        |                  |                         |           |                   |                  |
| 1 vs. 0 Facilities                                                 | 1.16                                   | 0.87-1.54        | <b>1.32</b>                            | <b>1.10-1.59</b> | 1.24                    | 0.89-1.74 | <b>1.26</b>       | <b>1.08-1.48</b> |
| 2 vs. 1 Facilities                                                 | 1.11                                   | 0.90-1.37        | <b>1.22</b>                            | <b>1.07-1.40</b> | 1.17                    | 0.91-1.51 | <b>1.18</b>       | <b>1.05-1.33</b> |
| 3 vs. 2 Facilities                                                 | 1.03                                   | 0.94-1.14        | <b>1.07</b>                            | <b>1.00-1.15</b> | 1.06                    | 0.94-1.21 | <b>1.06</b>       | <b>1.00-1.12</b> |
| 4 vs. 3 Facilities                                                 | 0.98                                   | 0.90-1.07        | 0.97                                   | 0.91-1.03        | 0.98                    | 0.88-1.11 | 0.97              | 0.92-1.02        |
| <b>No Nearby Facilities<br/>as Reference</b>                       |                                        |                  |                                        |                  |                         |           |                   |                  |
| 2 vs. 0 Facilities                                                 | 1.29                                   | 0.79-2.12        | <b>1.61</b>                            | <b>1.17-2.22</b> | 1.46                    | 0.81-2.62 | <b>1.49</b>       | <b>1.14-1.97</b> |
| 3 vs. 0 Facilities                                                 | 1.33                                   | 0.75-2.38        | <b>1.73</b>                            | <b>1.19-2.52</b> | 1.55                    | 0.78-3.09 | <b>1.58</b>       | <b>1.14-2.18</b> |
| 4 vs. 0 Facilities                                                 | 1.31                                   | 0.74-2.32        | <b>1.68</b>                            | <b>1.15-2.44</b> | 1.52                    | 0.76-3.05 | <b>1.52</b>       | <b>1.10-2.11</b> |

Supplemental Table 2 Odds ratios of at least one mammogram in two years by geographic access, stratified by income and education (N=5,930), Wisconsin Women's Health Study, 1995-2007

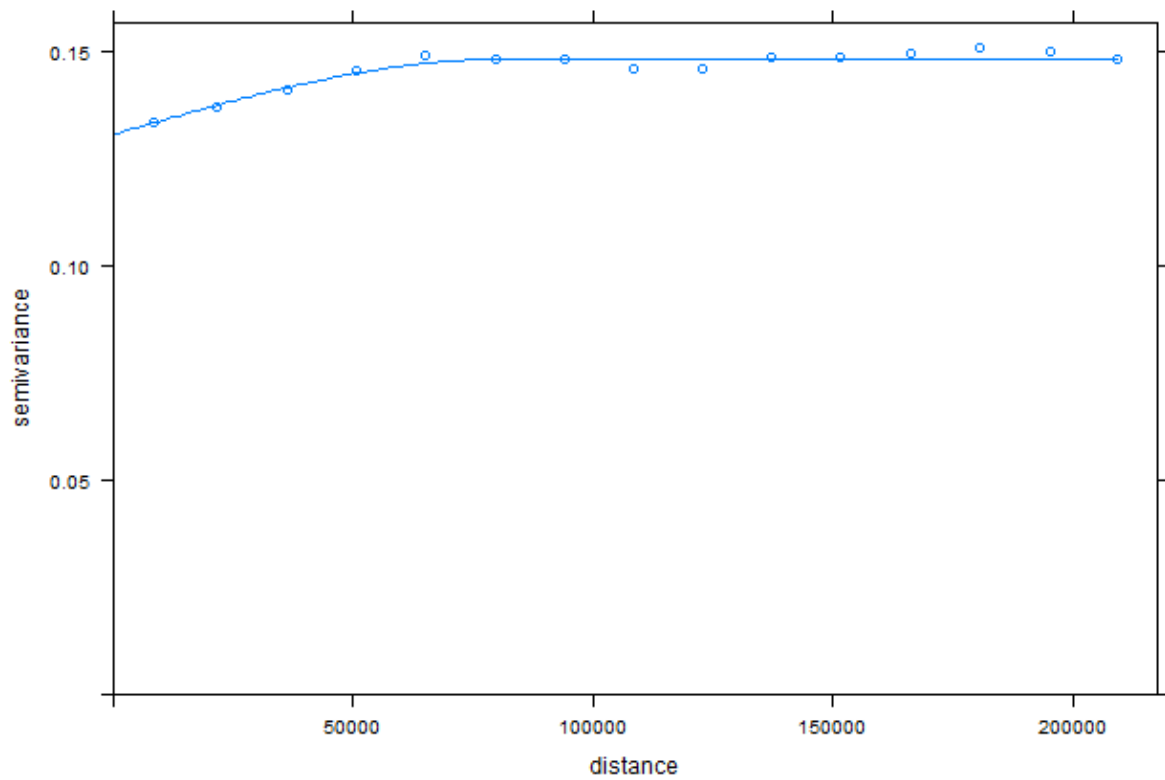

Supplemental Figure 1 Semivariogram of annual mammography utilization in Wisconsin (N=5,930), Wisconsin Women's Health Study, 1995-2007

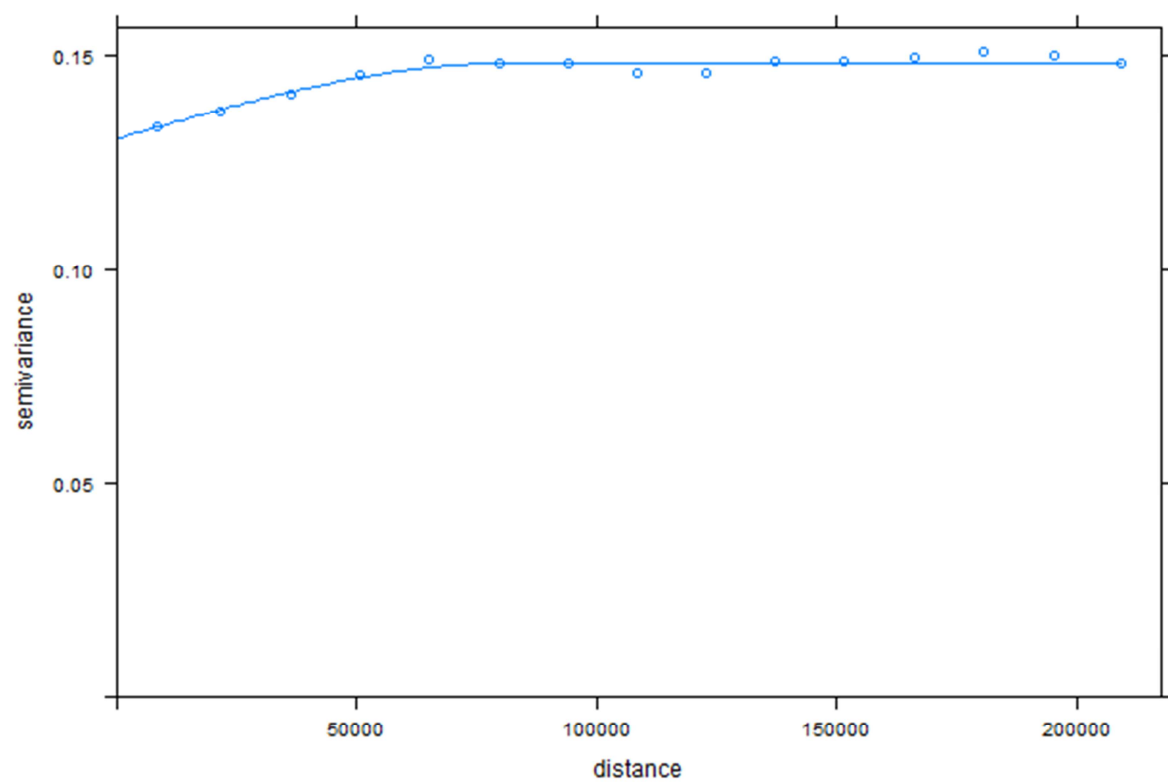

Supplement: NIHMS926018-supplement-supplement_1.pdf [file NIHMS926018-supplement-supplement_1.pdf]
